# Supplementary material for: Movement Synchrony Over Time: What Is in the Trajectory of Dyadic Interactions in Workplace Coaching?
Source: Front Psychol. 2022 Apr 28;13:845394. doi: 10.3389/fpsyg.2022.845394 (PMC9096892; doi:10.3389/fpsyg.2022.845394)
Supplement: Supplementary file 5 [file Table_5.XLSX]

## Sheet: Mean Linear Curve Fit
	Table S5. Cluster Dyads with Non-Linear Curve Fit
			Cluster Dyads with Non-Linear Curve Fit
			Model Summary				ANOVA						Coefficients
													Unstandardized coefficients			Standardized coefficients
			R Square	Adj R Square	Std. Error of Est.		Sum of squares	df	Mean Square	F	Sig. / p-value		B	Coeff. St. Error		Beta	t	Sig.
	SYN 101	cubic	0.717	0.575	0.133	Regression	0.27	3	0.09	5.055	0.044	Session	-0.723	0.194		-10.696	-3.724	0.01
						Residual	0.107	6	0.018			Session ** 2	0.139	0.04		23.289	3.483	0.013
												Session ** 3	-0.008	0.002		-13.237	-3.282	0.017
												(Constant)	2.056	0.259			7.943	0
	SYN 201	cubic	0.263	-0.843	0.163	Regression	0.019	3	0.006	0.238	0.865	Session	-0.316	0.672		-4.908	-0.47	0.684
						Residual	0.053	2	0.027			Session ** 2	0.124	0.215		13.811	0.578	0.621
												Session ** 3	-0.013	0.02		-9.142	-0.65	0.582
												(Constant)	1.106	0.589			1.877	0.201
	SYN 202	cubic	0.445	-0.387	0.087	Regression	0.012	3	0.004	0.535	0.703	Session	0.434	0.358		10.975	1.212	0.349
						Residual	0.015	2	0.008			Session ** 2	-0.138	0.115		-25.028	-1.208	0.35
												Session ** 3	0.013	0.011		14.633	1.2	0.353
												(Constant)	0.756	0.314			2.406	0.138
	SYN 502	quadratic	0.121	-0.13	0.155	Regression	0.023	2	0.012	0.483	0.636	Session	-0.062	0.076		-1.286	-0.813	0.443
						Residual	0.168	7	0.024			Session ** 2	0.006	0.007		1.448	0.916	0.39
												(Constant)	1.485	0.182			8.142	0
	SYN 602	cubic	0.191	-0.213	0.186	Regression	0.049	3	0.016	0.473	0.712	Session	0.314	0.271		5.622	1.159	0.291
						Residual	0.208	6	0.035			Session ** 2	-0.063	0.056		-12.751	-1.129	0.302
												Session ** 3	0.004	0.003		7.268	1.067	0.327
												(Constant)	0.974	0.361			2.698	0.036
	SYN 701	cubic	0.254	-0.119	0.119	Regression	0.029	3	0.01	0.681	0.595	Session	-0.23	0.173		-6.206	-1.332	0.231
						Residual	0.085	6	0.014			Session ** 2	0.044	0.036		13.349	1.231	0.264
												Session ** 3	-0.002	0.002		-7.285	-1.114	0.308
												(Constant)	1.685	0.231			7.309	0
	SYN 801	cubic	0.056	-0.416	0.156	Regression	0.009	3	0.003	0.119	0.946	Session	0.12	0.227		2.78	0.531	0.615
						Residual	0.146	6	0.024			Session ** 2	-0.022	0.047		-5.715	-0.468	0.656
												Session ** 3	0.001	0.003		3.016	0.41	0.696
												(Constant)	0.789	0.303			2.605	0.04
	SYN 901	cubic	0.143	-0.286	0.246	Regression	0.06	3	0.02	0.333	0.802	Session	0.274	0.357		3.825	0.766	0.473
						Residual	0.362	6	0.06			Session ** 2	-0.065	0.074		-10.192	-0.877	0.414
												Session ** 3	0.004	0.004		6.571	0.937	0.385
												(Constant)	1.309	0.477			2.748	0.033
	SYN 1101	cubic	0.98	0.95	0.029	Regression	0.083	3	0.028	32.749	0.03	Session	-0.673	0.119		-9.668	-5.633	0.03
						Residual	0.002	2	0.001			Session ** 2	0.238	0.038		24.431	6.22	0.025
												Session ** 3	-0.025	0.004		-15.792	-6.827	0.021
												(Constant)	2.09	0.105			19.935	0.003
	SYN 1201	cubic	0.713	0.425	0.092	Regression	0.063	3	0.021	2.481	0.238	Session	0.244	0.27		4.341	0.905	0.432
						Residual	0.025	3	0.008			Session ** 2	-0.103	0.076		-14.949	-1.354	0.269
												Session ** 3	0.01	0.006		10.638	1.622	0.203
												(Constant)	1.126	0.267			4.211	0.024
	SYN 1202	cubic	0.247	-0.884	0.302	Regression	0.06	3	0.02	0.218	0.878	Session	0.733	1.24		6.231	0.591	0.615
						Residual	0.183	2	0.091			Session ** 2	-0.267	0.397		-16.252	-0.673	0.57
												Session ** 3	0.027	0.038		10.156	0.714	0.549
												(Constant)	0.983	1.089			0.903	0.462
	SYN 1301	quadratic	0.883	0.805	0.07	Regression	0.111	2	0.056	11.331	0.04	Session	0.363	0.082		4.281	4.43	0.021
						Residual	0.015	3	0.005			Session ** 2	-0.054	0.011		-4.535	-4.693	0.018
												(Constant)	0.715	0.125			5.709	0.011
	SYN 1401	quadratic	0.526	0.21	0.073	Regression	0.018	2	0.009	1.663	0.327	Session	-0.145	0.086		-3.28	-1.685	0.191
						Residual	0.016	3	0.005			Session ** 2	0.022	0.012		3.488	1.792	0.171
												(Constant)	0.979	0.131			7.467	0.005
	SYN 1501	cubic	0.981	0.953	0.06	Regression	0.376	3	0.125	34.998	0.028	Session	-2.085	0.246		-14.088	-8.479	0.014
						Residual	0.007	2	0.004			Session ** 2	0,606	0.079		29.281	7.702	0.016
												Session ** 3	0.007	0.007		-15.322	-6.843	0.021
												(Constant)	0.216	0.216			16.9	0,003
	SYN 1802	cubic	1	.	.	Regression	0.028	3	0.009	.	.	Session	0.663	0		8.866	.	.
						Residual	0	0	.			Session ** 2	-0.251	0		-17.069	.	.
												Session ** 3	0.032	0		9.348	.	.
												(Constant)	0.663	0			.	.
	SYN 1902	quadratic	0.337	-0.327	0.161	Regression	0.026	2	0.013	0.507	0.663	Session	0.262	0.263		2.965	0.996	0.424
						Residual	0.052	2	0.026			Session ** 2	-0.041	0.043		-2.823	-0.948	0.443
												(Constant)	0.469	0.345			1.358	0.307
	SYN 1903	quadratic	0.866	0.731	0.079	Regression	0.08	2	0.04	6.439	0.134	Session	0.432	0.129		4.491	3.352	0.079
						Residual	0.012	2	0.006			Session ** 2	-0.075	0.021		-4.739	-3.536	0.071
												(Constant)	0.543	0.169			3.21	0.085
	SYN 2201	cubic	0.723	0.515	0.064	Regression	0.042	3	0.014	3.477	0.13	Session	-0.401	0.142		-10.781	-2.835	0.047
						Residual	0.016	4	0.004			Session ** 2	0,092	0.036		22.834	2.596	0.06
												Session ** 3	-0.006	0.003		-12.189	-2.318	0.081
												(Constant)	1.75	0.156			11.185	0,000
	SYN 2202	cubic	0.564	0.236	0.198	Regression	0.202	3	0.067	1.721	0.3	Session	-0.784	0.441		-8.483	-1.777	0.15
						Residual	0.156	4	0.039			Session ** 2	0,218	0.111		21.756	1.971	0.12
												Session ** 3	-0.016	0.008		-13.326	-2.02	0.114
												(Constant)	1.878	0.487			3.855	0,018
	SYN 2401	quadratic	0.649	0.549	0.102	Regression	0.134	2	0.067	6.472	0.026	Session	-0.18	0.05		-3.594	-3.597	0.009
						Residual	0.073	7	0.01			Session ** 2	0.015	0.004		3.491	3.494	0.01
												(Constant)	1.739	0.12			14.513	0
	SYN 2501	cubic	0.335	0.002	0.105	Regression	0.033	3	0.011	1.006	0.452	Session	0.224	0.152		6.467	1.47	0.192
						Residual	0.066	6	0.011			Session ** 2	-0.051	0.031		-16.486	-1.609	0.159
												Session ** 3	0.003	0.002		10.139	1.641	0.152
												(Constant)	0.884	0.203			4.35	0.005
	SYN 2701	quadratic	0.454	0.298	0.062	Regression	0.023	2	0.011	2.913	0.12	Session	0.071	0.031		2.9	2.328	0.053
						Residual	0.027	7	0.004			Session ** 2	-0.007	0.003		-3.004	-2.411	0.047
												(Constant)	1.39	0.073			18.982	0
	SYN 2801	cubic	0.802	0.604	0.107	Regression	0.14	3	0.047	4.054	0.14	Session	0.336	0.314		4.264	1.071	0.363
						Residual	0.034	3	0.011			Session ** 2	-0.115	0.088		-11.886	-1.297	0.285
												Session ** 3	0.011	0.007		8.538	1.569	0.215
												(Constant)	0.85	0.311			2.732	0.072
	SYN 2802	cubic	0.571	0.314	0.143	Regression	0.137	3	0.046	2.222	0.204	Session	0.511	0.254		8.079	2.009	0.101
						Residual	0.103	5	0.021			Session ** 2	-0.116	0.058		-18.879	-2.023	0.099
												Session ** 3	0.008	0.004		11.595	2.068	0.093
												(Constant)	0.416	0.31			1.342	0.237
	SYN 2901	quadratic	0.265	-0.225	0.145	Regression	0.023	2	0.011	0.541	0.63	Session	0.119	0.17		1.706	0.704	0.532
						Residual	0.063	3	0.021			Session ** 2	-0.02	0.024		-2.049	-0.845	0.46
												(Constant)	1.005	0.259			3.876	0.03
	SYN 3002	cubic	0.304	-0.043	0.122	Regression	0.039	3	0.013	0.875	0.504	Session	-0.219	0.178		-5.552	-1.234	0.263
						Residual	0.089	6	0.015			Session ** 2	0.052	0.037		14.882	1.421	0.205
												Session ** 3	-0.003	0.002		-9.497	-1.503	0.183
												(Constant)	1.644	0.237			6.942	0
	SYN 3101	quadratic	0.481	0.308	0.142	Regression	0.112	2	0.056	2.779	0.14	Session	0.163	0.083		2.611	1.962	0.097
						Residual	0.121	6	0.02			Session ** 2	-0.013	0.008		-2.162	-1.624	0.155
												(Constant)	0.596	0.18			3.304	0.016
	SYN 3201	cubic	0.081	-0.379	0.145	Regression	0.011	3	0.004	0.176	0.909	Session	0.146	0.211		3.59	0.694	0.513
						Residual	0.126	6	0.021			Session ** 2	-0.031	0.043		-8.675	-0.72	0.498
												Session ** 3	0.002	0.003		5.201	0.716	0.501
												(Constant)	1.116	0.281			3.971	0.007
	SYN 3202	cubic	0.264	-0.178	0.21	Regression	0.079	3	0.026	0.597	0.644	Session	-0.418	0.373		-5.904	-1.12	0.313
						Residual	0.221	5	0.044			Session ** 2	0,081	0.084		11.776	0,963	0.38
												Session ** 3	-0.005	0.006		-6.036	-0.822	0.449
												(Constant)	2.081	0.455			4.575	0,006
	SYN 3301	quadratic	0.982	0.965	0.006	Regression	0.005	2	0.002	55.544	0.018	Session	0.106	0.011		4.847	9.973	0.01
						Residual	0	2	0			Session ** 2	-0.018	0.002		-5.076	-10.444	0.009
												(Constant)	1.308	0.014			94.214	0
	SYN 3302	cubic	0.99	0.96	0.023	Regression	0.052	3	0.017	33.147	0.127	Session	1.45	0.148		19.933	9.824	0.065
						Residual	0.001	1	0.001			Session ** 2	-0.518	0.055		-43.593	-9.465	0,067
												Session ** 3	0.055	0.006		24.302	9.067	0,070
												(Constant)	0.194	0.133			1.715	0,336
	SYN 3501	quadratic	0.023	-0.256	0.152	Regression	0.004	2	0.002	0.084	0.921	Session	0.031	0.075		0.681	0.408	0.695
						Residual	0.162	7	0.023			Session ** 2	-0.003	0.007		-0.656	-0.394	0.706
												(Constant)	0.895	0.179			4.995	0.002
	SYN 3601	quadratic	0.259	-0.235	0.089	Regression	0.008	2	0.004	0.524	0.638	Session	0.084	0.104		1.966	0.808	0.478
						Residual	0.024	3	0.008			Session ** 2	-0.013	0.015		-2.237	-0.919	0.426
												(Constant)	1.083	0.159			6.792	0.007
	SYN 3701	cubic	0.578	0.367	0.161	Regression	0.212	3	0.071	2.739	0.136	Session	0.338	0.234		5.066	1.446	0.198
						Residual	0.155	6	0.026			Session ** 2	-0.092	0.048		-15.555	-1.906	0.105
												Session ** 3	0.006	0.003		10.503	2.134	0.077
												(Constant)	0.56	0.312			1.796	0.123
	SYN 3801	cubic	0.703	0.481	0.087	Regression	0.071	3	0.024	3.161	0.148	Session	0.489	0.193		9.939	2.526	0.065
						Residual	0.03	4	0.008			Session ** 2	-0.136	0.049		-25.572	-2.81	0.048
												Session ** 3	0.011	0.004		16.079	2.956	0.042
												(Constant)	0.838	0.214			3.919	0.017
	SYN 4001	quadratic	0.84	0.519	0.179	Regression	0.168	2	0.084	2.619	0.4	Session	1.017	0.455		5.075	2.232	0.268
						Residual	0.032	1	0.032			Session ** 2	-0.205	0.09		-5.198	-2.286	0.262
												(Constant)	0.303	0.499			0.606	0.653
	SYN 4002	quadratic	0.64	0.496	0.087	Regression	0.068	2	0.034	4.446	0.078	Session	-0.173	0.062		-3.438	-2.78	0.039
						Residual	0.038	5	0.008			Session ** 2	0.017	0.007		3.067	2.48	0.056
												(Constant)	1.733	0.122			14.231	0
	SYN 4201	quadratic	0.463	0.194	0.248	Regression	0.212	2	0.106	1.722	0.289	Session	0.313	0.222		2.444	1.411	0.231
						Residual	0.246	4	0.062			Session ** 2	-0.044	0.027		-2.831	-1.634	0.178
												(Constant)	0.986	0.387			2.551	0.063
	SYN 4401	quadratic	0.842	0.779	0.059	Regression	0.091	2	0.046	13.303	0.01	Session	0.111	0.042		2.192	2.673	0.044
						Residual	0.017	5	0.003			Session ** 2	-0.016	0.005		-2.924	-3.566	0.016
												(Constant)	1.306	0.082			15.99	0
	SYN 4403	cubic	1	.	.	Regression	0.045	3	0.015	.	.	Session	0.504	0		5.289	.	.
						Residual	0	0	.			Session ** 2	-0.146	0		-7.806	.	.
												Session ** 3	0.015	0		3.517	.	.
												(Constant)	0.731	0
	SYN 4404	quadratic	0.623	0.473	0.153	Regression	0.194	2	0.097	4.138	0.087	Session	0.179	0.109		2.083	1.647	0.161
						Residual	0.117	5	0.023			Session ** 2	-0.025	0.012		-2.681	-2.119	0.088
												(Constant)	1.053	0.214			4.929	0.004
	SYN 4501	quadratic	0.698	0.612	0.256	Regression	1.062	2	0.531	8.106	0.015	Session	-0.184	0.126		-1.356	-1.465	0.186
						Residual	0.459	7	0.066			Session ** 2	0.025	0.011		2.1	2.268	0.058
												(Constant)	1.534	0.301			5.096	0.001
	SYN 4601	quadratic	0.503	0.361	0.107	Regression	0.08	2	0.04	3.537	0.087	Session	-0.11	0.052		-2.491	-2.094	0.075
						Residual	0.08	7	0.011			Session ** 2	0.011	0.005		2.864	2.408	0.047
												(Constant)	1.588	0.125			12.667	0
	SYN 4602	cubic	0.528	0.291	0.145	Regression	0.141	3	0.047	2.233	0.185	Session	-0.13	0.211		-2.289	-0.617	0.56
						Residual	0.126	6	0.021			Session ** 2	0.049	0.043		9.633	1.116	0.307
												Session ** 3	-0.004	0.003		-7.416	-1.424	0.204
												(Constant)	0.971	0.281			3.451	0.014
	SNY 4701	quadratic	0.583	0.464	0.103	Regression	0.103	2	0.051	4.888	0.047	Session	-0.14	0.05		-3.018	-2.771	0.028
						Residual	0.074	7	0.011			Session ** 2	0.011	0.004		2.588	2.376	0.049
												(Constant)	1.683	0.121			13.953	0
	SYN 4702	cubic	0.222	-0.166	0.185	Regression	0.058	3	0.019	0.572	0.654	Session	-0.319	0.269		-5.644	-1.186	0.28
						Residual	0.205	6	0.034			Session ** 2	0.06	0.055		12.002	1.084	0.32
												Session ** 3	-0.003	0.003		-6.753	-1.011	0.351
												(Constant)	1.772	0.358			4.945	0.003
	SYN 4802	quadratic	0.253	0.039	0.056	Regression	0.007	2	0.004	1.184	0.361	Session	-0.042	0.028		-2.231	-1.531	0.17
						Residual	0.022	7	0.003			Session ** 2	0.004	0.002		2.226	1.527	0.171
												(Constant)	1.201	0.066			18.143	0
	SYN 5002	cubic	0.964	0.91	0.058	Regression	0.178	3	0.059	17.919	0.053	Session	0.963	0.236		9.376	4.074	0.055
						Residual	0.007	2	0.003			Session ** 2	-0.242	0.076		-16.856	-3.201	0.085
												Session ** 3	0.019	0.007		8.36	2.696	0.114
												(Constant)	-0.18	0.207			-0.866	0.478
	SYN 5102	quadratic	0.465	0.287	0.095	Regression	0.047	2	0.024	2.611	0.153	Session	0.123	0.056		2.988	2.212	0.069
						Residual	0.054	6	0.009			Session ** 2	-0.011	0.005		-2.743	-2.031	0.089
												(Constant)	0.753	0.121			6.221	0.001
	SYN 5201	quadratic	0.284	0.045	0.183	Regression	0.08	2	0.04	1.189	0.367	Session	-0.151	0.107		-2.203	-1.409	0.209
						Residual	0.201	6	0.034			Session ** 2	0.013	0.01		1.932	1.236	0.263
												(Constant)	1.443	0.233			6.195	0.001
	SYN 5401	quadratic	0.585	0.467	0.108	Regression	0.115	2	0.058	4.938	0.046	Session	0.136	0.053		2.787	2.566	0.037
						Residual	0.082	7	0.012			Session ** 2	-0.01	0.005		-2.274	-2.094	0.075
												(Constant)	1.065	0.127			8.387	0
	SYN 5501	quadratic	0.371	0.191	0.097	Regression	0.039	2	0.02	2.065	0.197	Session	-0.094	0.048		-2.63	-1.966	0.09
						Residual	0.066	7	0.009			Session ** 2	0.009	0.004		2.717	2.031	0.082
												(Constant)	1.215	0.114			10.624	0
	SYN 5502	cubic	0.577	0.365	0.098	Regression	0.079	3	0.026	2.724	0.137	Session	-0.326	0.143		-7.989	-2.276	0.063
						Residual	0.058	6	0.01			Session ** 2	0.056	0.03		15.372	1.881	0.109
												Session ** 3	-0.003	0.002		-7.836	-1.59	0.163
												(Constant)	1.547	0.191			8.1	0
	SYN 5801	cubic	0.816	0.541	0.085	Regression	0.064	3	0.021	2.963	0.263	Session	-0.84	0.347		-12.594	-2.418	0.137
						Residual	0.014	2	0.007			Session ** 2	0.245	0.111		26.308	2.207	0.158
												Session ** 3	-0.021	0.011		-13.771	-1.962	0.189
												(Constant)	2.188	0.305			7.177	0.019
	SYN 5803	cubic	1	.	.	Regression	0.035	3	0.012	.	.	Session	-0.957	0		-11.444	.	.
						Residual	0	0	.			Session ** 2	0.525	0		31.895	.	.
												Session ** 3	-0.078	0		-20.441	.	.
												(Constant)	1.818	0.1
	SYN 5902	quadratic	0.212	-0.014	0.129	Regression	0.031	2	0.016	0.939	0.435	Session	-0.083	0.063		-1.959	-1.308	0.232
						Residual	0.116	7	0.017			Session ** 2	0.008	0.006		2.046	1.366	0.214
												(Constant)	1.241	0.151			8.207	0
	SYN 6103	quadratic	0.27	0.027	0.121	Regression	0.032	2	0.016	1.112	0.388	Session	-0.098	0.071		-2.189	-1.387	0.215
						Residual	0.088	6	0.015			Session ** 2	0.01	0.007		2.326	1.474	0.191
												(Constant)	1.232	0.154			8.017	0
	SYN 6203	quadratic	0.935	0.909	0.06	Regression	0.256	2	0.128	35.852	0.001	Session	-0.315	0.043		-3.896	-7.401	0.001
						Residual	0.018	5	0.004			Session ** 2	0.037	0.005		4.273	8.117	0
												(Constant)	1.504	0.083			18.043	0
	SYN 6301	quadratic	0.696	0.493	0.075	Regression	0.038	2	0.019	3.428	0.168	Session	-0.109	0.088		-1.936	-1.241	0.303
						Residual	0.017	3	0.006			Session ** 2	0.021	0.012		2.629	1.686	0.19
												(Constant)	1.336	0.134			9.97	0.002
	SYN 6302	quadratic	0.541	0.311	0.058	Regression	0.016	2	0.008	2.357	0.211	Session	0.111	0.052		3.403	2.126	0.101
						Residual	0.014	4	0.003			Session ** 2	-0.014	0.006		-3.476	-2.171	0.096
												(Constant)	1.114	0.091			12.277	0
	SYN 6401	cubic	0.796	0.491	0.12	Regression	0.113	3	0.038	2.606	0.289	Session	-0.74	0.494		-8.21	-1.497	0.273
						Residual	0.029	2	0.014			Session ** 2	0.288	0.158		22.863	1.822	0.21
												Session ** 3	-0.031	0.015		-15.266	-2.065	0.175
												(Constant)	1.901	0.434			4.383	0.048
	SYN 6402	cubic	0.956	0.89	0.066	Regression	0.189	3	0.063	14.498	0.065	Session	-0.716	0.271		-6.741	-2.646	0.118
						Residual	0.009	2	0.004			Session ** 2	0.306	0.087		20.582	3.53	0.072
												Session ** 3	-0.034	0.008		-14.394	-4.192	0.052
												(Constant)	1.451	0.237			6.109	0.026
	SYN 6403	quadratic	0.643	0.464	0.094	Regression	0.063	2	0.032	3.597	0.128	Session	0.176	0.084		2.977	2.108	0.103
						Residual	0.035	4	0.009			Session ** 2	-0.017	0.01		-2.414	-1.709	0.163
												(Constant)	0.551	0.146			3.774	0.02
	SYN 6501	quadratic	0.382	0.205	0.158	Regression	0.109	2	0.054	2.163	0.186	Session	-0.143	0.078		-2.437	-1.839	0.109
						Residual	0.176	7	0.025			Session ** 2	0.011	0.007		2.086	1.574	0.16
												(Constant)	1.808	0.186			9.703	0
	SYN 6502	quadratic	0.402	0.162	0.078	Regression	0.021	2	0.01	1.678	0.277	Session	0.099	0.056		2.826	1.772	0.137
						Residual	0.031	5	0.006			Session ** 2	-0.01	0.006		-2.597	-1.629	0.164
												(Constant)	1.196	0.109			10.95	0
	SYN 6701	cubic	0.687	0.498	0.063	Regression	0.044	3	0.015	3.65	0.099	Session	0.292	0.112		8.976	2.611	0.048
						Residual	0.02	5	0.004			Session ** 2	-0.073	0.025		-23.128	-2.898	0.034
												Session ** 3	0.005	0.002		14.214	2.964	0.031
												(Constant)	0.912	0.136			6.681	0.001
	SYN 6802	cubic	0.967	0.917	0.03	Regression	0.052	3	0.017	19.512	0.049	Session	-0.624	0.122		-11.277	-5.106	0.036
						Residual	0.002	2	0.001			Session ** 2	0.221	0.039		28.518	5.642	0.03
												Session ** 3	-0.021	0.004		-17.046	-5.727	0.029
												(Constant)	1.466	0.107			13.668	0.005
	SYN 7101	cubic	0.777	0.442	0.103	Regression	0.073	3	0.024	2.323	0.315	Session	1.014	0.422		13.793	2.404	0.138
						Residual	0.021	2	0.011			Session ** 2	-0.305	0.135		-29.659	-2.259	0.152
												Session ** 3	0.027	0.013		16.669	2.155	0.164
												(Constant)	0.489	0.37			1.322	0.317
	SYN 7102	cubic	0.742	-0.034	0.193	Regression	0.107	3	0.036	0.956	0.618	Session	-1.821	1.24		-15.175	-1.468	0.381
						Residual	0.037	1	0.037			Session ** 2	0.676	0.46		34.45	1.468	0.381
												Session ** 3	-0.075	0.051		-20.192	-1.479	0.379
												(Constant)	2.779	0.949			2.929	0.209
	SYN 7501	quadratic	0.737	0.605	0.059	Regression	0.039	2	0.019	5.6	0.069	Session	-0.138	0.053		-3.184	-2.627	0.058
						Residual	0.014	4	0.003			Session ** 2	0.014	0.006		2.58	2.128	0.1
												(Constant)	1.508	0.092			16.424	0
	SYN 7601	quadratic	0.267	-0.027	0.086	Regression	0.014	2	0.007	0.909	0.461	Session	0.082	0.061		2.372	1.344	0.237
						Residual	0.037	5	0.007			Session ** 2	-0.009	0.007		-2.272	-1.287	0.254
												(Constant)	0.675	0.12			5.612	0.002
	SYN 7602	quadratic	0.537	0.405	0.049	Regression	0.02	2	0.01	4.062	0.067	Session	0.045	0.024		2.126	1.853	0.106
						Residual	0.017	7	0.002			Session ** 2	-0.005	0.002		-2.629	-2.291	0.056
												(Constant)	1.023	0.058			17.633	0
	SYN 7901	cubic	0.705	0.41	0.109	Regression	0.085	3	0.028	2.392	0.246	Session	0.48	0.318		-7.335	-1.509	0.228
						Residual	0.035	3	0.012			Session ** 2	0.098	0.089		12.21	1.092	0.355
												Session ** 3	-0.006	0.007		-5.345	-0.805	0.48
												(Constant)	2.072	0.315			6.573	0.007
	SYN 7902	quadratic	0.842	0.737	0.079	Regression	0.1	2	0.05	7.998	0.063	Session	0.359	0.093		4.344	3.867	0.031
						Residual	0.019	3	0.006			Session ** 2	-0.052	0.013		-4.486	-3.994	0.028
												(Constant)	0.732	0			5.166	0.014
	SYN 8001	quadratic	0.208	-0.109	0.135	Regression	0.024	2	0.012	0.655	0.559	Session	-0.105	0.096		-2.002	-1.091	0.325
						Residual	0.091	5	0.018			Session ** 2	0.01	0.01		1.817	0.99	0.368
												(Constant)	1.541	0.188			8.182	0.001
	SYN 8002	quadratic	1	.	.	Regression	0.104	2	0.052	.	.	Session	1.599	0		7	.	.
						Residual	0	0	.			Session ** 2	-0.391	0		-6.917	.	.
												(Constant)	0.11	0			.	.
	SYN 8201	quadratic	0.79	0.649	0.025	Regression	0.007	2	0.003	5.630	0.096	Session	-0.09	0.029		-4.038	-3.115	0.053
						Residual	0.002	3	0.001			Session ** 2	0.011	0.004		3.623	2.794	0.068
												(Constant)	1.108	0.044			25.145	0.000
	SYN 8202	quadratic	0.658	0.430	0.091	Regression	0.047	2	0.024	2.885	0.200	Session	-0.237	0.106		-3.698	-2.237	0.111
						Residual	0.025	3	0.008			Session ** 2	0.03	0.015		3.325	2.011	0.138
												(Constant)	1.188	0.162			7.332	0.005
	SYN 8403	cubic	0.373	-0.253	0.363	Regression	0.236	3	0.079	0.596	0.66	Session	-1.077	1.065		-7.17	-1.012	0.386
						Residual	0.396	3	0.132			Session ** 2	0.337	0.299		18.346	1.125	0.342
												Session ** 3	-0.03	0.025		-11.654	-1.203	0.315
												(Constant)	2.207	1.055			2.091	0.128
	SYN 8701	cubic	0.501	0.003	0.161	Regression	0.079	3	0.026	1.006	0.498	Session	0.777	0.473		10.39	1.644	0.199
						Residual	0.078	3	0.026			Session ** 2	-0.228	0.133		-24.974	-1.717	0.184
												Session ** 3	0.019	0.011		14.924	1.728	0.183
												(Constant)	0.641	0.469			1.369	0.265
	SYN 8702	quadratic	0.964	0.893	0.04	Regression	0.042	2	0.021	13.492	0.189	Session	-0.522	0.101		-5.573	-5.192	0.121
						Residual	0.002	1	0.002			Session ** 2	0.102	0.02		5.52	5.142	0.122
												(Constant)	1.488	0.11			13.507	0.047
	SYN 8801	quadratic	0.978	0.956	0.055	Regression	0.272	2	0.136	44.482	0.022	Session	-0.175	0.09		-1.052	-1.941	0.192
						Residual	0.006	2	0.003			Session ** 2	0.054	0.015		2	3.69	0.066
												(Constant)	1.141	0.119			9.628	0.011
	SYN 8802	cubic	0.998	0.993	0.015	Regression	0.13	3	0.043	185.028	0.054	Session	1.626	0.098		14.253	16.529	0.038
						Residual	0	1	0			Session ** 2	-0.595	0.037		-31.91	-16.303	0.039
												Session ** 3	0.067	0.004		18.836	16.536	0.038
												(Constant)	-0.026	0.075			-0.34	0.791
	SYN 8901	cubic	0.654	0.481	0.119	Regression	0.16	3	0.053	3.776	0.078	Session	0.292	0.173		5.352	1.686	0.143
						Residual	0.085	6	0.014			Session ** 2	-0.071	0.036		-14.657	-1.983	0.095
												Session ** 3	0.005	0.002		10.08	2.261	0.064
												(Constant)	1.139	0.231			4.933	0.003
	SYN 9001	quadratic	0.211	-0.014	0.166	Regression	0.052	2	0.026	0.937	0.436	Session	0.105	0.082		1.934	1.291	0.238
						Residual	0.193	7	0.028			Session ** 2	-0.01	0.007		-2.037	-1.36	0.216
												(Constant)	1.016	0.195			5.198	0.001
	SYN 9101	quadratic	0.833	0.667	0.076	Regression	0.058	2	0.029	4.998	0.167	Session	0.367	0.124		4.403	2.95	0.098
						Residual	0.012	2	0.006			Session ** 2	-0.063	0.02		-4.648	-3.114	0.089
												(Constant)	1.101	0.163			6.747	0.021
	SYN 9201	cubic	0.867	0.787	0.109	Regression	0.388	3	0.129	10.836	0.013	Session	0.939	0.194		10.875	4.85	0.005
						Residual	0.06	5	0.012			Session ** 2	-0.229	0.044		-27.196	-5.225	0.003
												Session ** 3	0.015	0.003		16.442	5.258	0.003
												(Constant)	0.265	0.236			1.125	0.312
	SYN 9301	cubic	0.761	0.401	0.05	Regression	0.016	3	0.005	2.118	0.337	Session	0.325	0.205		9.433	1.587	0.254
						Residual	0.05	2	0.002			Session ** 2	-0.099	0.066		-20.567	-1.512	0.27
												Session ** 3	0.009	0.006		12.151	1.516	0.269
												(Constant)	0.637	0.18			3.54	0.071
	SYN 9302	quadratic	0.277	-0.084	0.073	Regression	0.008	2	0.004	0.767	0.523	Session	-0.079	0.065		-2.454	-1.222	0.289
						Residual	0.021	4	0.005			Session ** 2	0.009	0.008		2.313	1.151	0.314
												(Constant)	1.343	0.113			11.882	0
	SYN 9402	cubic	0.501	0.201	0.091	Regression	0.041	3	0.014	1.672	0.287	Session	-0.324	0.16		-8.773	-2.022	0.099
						Residual	0.041	5	0.008			Session ** 2	0.065	0.036		18.04	1.791	0.133
												Session ** 3	-0.004	0.002		-9.669	-1.598	0.171
												(Constant)	1.537	0.196			7.854	0.001
	SYN 9403	cubic	0.148	-0.277	0.098	Regression	0.01	3	0.003	0.349	0.792	Session	-0.111	0.143		-3.859	-0.775	0.468
						Residual	0.058	6	0.01			Session ** 2	0.025	0.029		9.95	0.859	0.424
												Session ** 3	-0.002	0.002		-6.068	-0.868	0.419
												(Constant)	1.088	0.19			5.722	0.001
	SYN 9601	cubic	0.371	-0.257	0.225	Regression	0.09	3	0.03	0.591	0.662	Session	-0.75	0.66		-8.071	-1.138	0.338
						Residual	0.152	3	0.051			Session ** 2	0.19	0.186		16.746	1.025	0.381
												Session ** 3	-0.015	0.015		-9.214	-0.95	0.412
												(Constant)	2.045	0.654			3.127	0.052	.
	SYN 9701	cubic	1	.	.	Regression	0.095	3	0.032	.	.	Session	-3.41	0		-24.709	.	.
						Residual	0	0	.			Session ** 2	1.412	0		51.97	.	.
												Session ** 3	-0.175	0		-27.724	.	.
												(Constant)	3.874	0			.	.	.
	SYN 9901	quadratic	1	1	0.002	Regression	0.096	2	0.048	9.584	0.007	Session	0.786	0.006		5.677	138.407	0.005
						Residual	0	1	0			Session ** 2	-0.153	0.001		-5.613	-136.847	0.005
												(Constant)	0.372	0.006			59.679	0.011
	Note: Independent variable is Session. Table 8 indicates best linear curve fit coefficients for N = 94 dyads. R square represents the proportion of the variance for movements synchrony per dyad explained by the number of sessions as the independent variable or variables in the regression model. Adj R-square adjusts the statistic based on the number of independent variables in the model. Std. Erro…
